# Supplementary material
Source: publisher site journal article supplement (http://www.kjim.org/upload/media/kjim-2019-006-suppl1.pdf)
Supplement: Supplementary file 1 [file kjim-2019-006-suppl1.pdf]

**Supplementary Table 1. Demographic characteristics of the study patients**

| Characteristic               | All (n = 335)    | BMI < 25 (n = 226) | BMI ≥ 25 (n = 109) | p value |
|------------------------------|------------------|--------------------|--------------------|---------|
| Age, yr                      | 56.0 ± 11.9      | 55.3 ± 12.0        | 57.5 ± 11.8        | 0.110   |
| Women                        | 284 (84.8)       | 193 (85.4)         | 91 (83.5)          | 0.640   |
| HTN                          | 88 (26.3)        | 53 (23.5)          | 35 (32.1)          | 0.043   |
| DM                           | 33 (9.9)         | 16 (7.1)           | 17 (15.6)          | 0.009   |
| RA duration, yr              | 6 (3.5–9)        | 7.61 (3.1–10)      | 7.0 (4–9)          | 0.700   |
| Seropositivity <sup>a</sup>  | 276 (87.4)       | 194 (85.8)         | 82 (75.2)          | 0.017   |
| CRP <sup>b</sup> , mg/L      | 1.04 (0–2.94)    | 0.10 (0–2.69)      | 1.68 (0–3.19)      | 0.013   |
| ESR, mm/hr                   | 21 (12–31)       | 18 (10–30)         | 25 (15–32)         | 0.032   |
| DAS28-ESR                    | 3.55 ± 1.14      | 3.46 ± 1.11        | 3.75 ± 1.18        | 0.031   |
| DAS28-P                      | 0.36 ± 0.17      | 0.35 ± 0.17        | 0.37 ± 0.18        | 0.300   |
| HAQ                          | 0.25 (0–0.63)    | 0.13 (0–0.56)      | 0.25 (0–0.75)      | 0.100   |
| VAS pain, range (0–100)      | 40 (20–50)       | 35 (20–50)         | 40 (20–60)         | 0.031   |
| GC use                       | 252 (75.2)       | 174 (77)           | 78 (71.6)          | 0.280   |
| BMI, kg/m <sup>2</sup>       | 23.6 ± 3.6       | 21.6 ± 2.2         | 27.7 ± 2.3         | < 0.001 |
| Body fat mass, kg            | 19.3 (15.6–24.1) | 17.2 (13.8–19.6)   | 26.4 (23.7–30.3)   | < 0.001 |
| Skeletal muscle mass, kg     | 20.9 (18.9–23.2) | 20.15 (18.4–22.3)  | 22.2 (20.4–25.2)   | < 0.001 |
| Body fat/skeletal mass ratio | 0.91 (0.7–1.1)   | 0.9 (0.7–1.1)      | 0.95 (0.79–1.21)   | 0.098   |

Values are presented as mean ± SD, number (%), or median (interquartile range).

BMI, body mass index; HTN, hypertension; DM, diabetes mellitus; RA, rheumatoid arthritis; CRP, C-reactive protein; ESR, erythrocyte sedimentation rate; DAS28, disease activity score in 28 joints; DAS28-P, an index derived to measure the subjective component of DAS28; HAQ, health assessment questionnaire; VAS, visual analogue scale; GC, glucocorticoid; BMI, body mass index.

<sup>a</sup>Seropositivity was defined as either rheumatoid factor or anti-citrullinated protein antibody positivity.

<sup>b</sup>The reporting limit was < 0.1 mg/L, which was given a value of 0 for analysis.
